# Supplementary material for: Attitudes toward the SARS-CoV-2 Vaccine: Results from the Saudi Residents’ Intention to Get Vaccinated against COVID-19 (SRIGVAC) Study
Source: MDPI journal article supplement (doi:10.3390/vaccines9070798), 2021-07-18
Supplement: s1 [file s1]

**Table S1:** Reasons for vaccine hesitancy among participants who answered “no” regarding their intentions to get vaccinated (n=619).

|                                                                                         | Strongly Disagree |       | Disagree |        | Neutral |        | Agree |        | Strongly agree |        |
|-----------------------------------------------------------------------------------------|-------------------|-------|----------|--------|---------|--------|-------|--------|----------------|--------|
|                                                                                         | n                 | %     | n        | %      | n       | %      | n     | %      | n              | %      |
| <b>Vaccine-related side effects</b>                                                     | 9                 | 1.50% | 34       | 5.50%  | 140     | 22.60% | 205   | 33.10% | 231            | 37.30% |
| <b>Short periods of clinical testing</b>                                                | 9                 | 1.50% | 31       | 5.00%  | 111     | 17.90% | 151   | 24.40% | 317            | 51.20% |
| <b>Poor efficacy</b>                                                                    | 18                | 2.90% | 50       | 8.10%  | 220     | 35.50% | 135   | 21.80% | 196            | 31.70% |
| <b>Low likelihood of getting the COVID-19 infection</b>                                 | 20                | 3.20% | 83       | 13.40% | 183     | 29.60% | 136   | 22.00% | 197            | 31.80% |
| <b>Lack of trust in health and scientific authorities</b>                               | 48                | 7.80% | 141      | 22.80% | 198     | 32.00% | 106   | 17.10% | 126            | 20.40% |
| <b>Lack of trust in vaccine outcomes which are produced by pharmaceutical companies</b> | 57                | 9.20% | 118      | 19.10% | 202     | 32.60% | 90    | 14.50% | 152            | 24.60% |
| <b>Pharmaceutical companies promote the vaccine for financial gain</b>                  | 43                | 6.90% | 118      | 19.10% | 186     | 30.00% | 104   | 16.80% | 168            | 27.10% |
| <b>COVID-19 is harmless</b>                                                             | 33                | 5.30% | 133      | 21.50% | 193     | 31.20% | 123   | 19.90% | 137            | 22.10% |
| <b>Preference for acquired immunity via COVID-19 infection</b>                          | 35                | 5.70% | 63       | 10.20% | 211     | 34.10% | 151   | 24.40% | 159            | 25.70% |
| <b>Vaccines contradict natural remedies</b>                                             | 29                | 4.70% | 99       | 16.00% | 203     | 32.80% | 135   | 21.80% | 153            | 24.70% |
| <b>Moral opposition to get vaccinated</b>                                               | 47                | 7.60% | 122      | 19.70% | 227     | 36.70% | 81    | 13.10% | 142            | 22.90% |

**Table S2:** Reasons for vaccine hesitancy among participants who answered “unsure” regarding their intentions to get vaccinated (n=817).

|                                                                                         | <b>Strongly Disagree</b> |          | <b>Disagree</b> |          | <b>Neutral</b> |          | <b>Agree</b> |          | <b>Strongly agree</b> |          |
|-----------------------------------------------------------------------------------------|--------------------------|----------|-----------------|----------|----------------|----------|--------------|----------|-----------------------|----------|
|                                                                                         | <b>n</b>                 | <b>%</b> | <b>n</b>        | <b>%</b> | <b>n</b>       | <b>%</b> | <b>n</b>     | <b>%</b> | <b>n</b>              | <b>%</b> |
| <b>Vaccine-related side effects</b>                                                     | 27                       | 3.30%    | 95              | 11.60%   | 472            | 57.80%   | 169          | 20.70%   | 54                    | 6.60%    |
| <b>Short periods of clinical testing</b>                                                | 13                       | 1.60%    | 83              | 10.20%   | 400            | 49.00%   | 223          | 27.30%   | 98                    | 12.00%   |
| <b>Poor efficacy</b>                                                                    | 45                       | 5.50%    | 176             | 21.50%   | 491            | 60.10%   | 76           | 9.30%    | 29                    | 3.50%    |
| <b>Low likelihood of getting the COVID-19 infection</b>                                 | 58                       | 7.10%    | 193             | 23.60%   | 420            | 51.40%   | 103          | 12.60%   | 43                    | 5.30%    |
| <b>Lack of trust in health and scientific authorities</b>                               | 134                      | 16.40%   | 279             | 34.10%   | 339            | 41.50%   | 46           | 5.60%    | 19                    | 2.30%    |
| <b>Lack of trust in vaccine outcomes which are produced by pharmaceutical companies</b> | 134                      | 16.40%   | 230             | 28.20%   | 376            | 46.00%   | 53           | 6.50%    | 24                    | 2.90%    |
| <b>Pharmaceutical companies promote the vaccine for financial gain</b>                  | 124                      | 15.20%   | 218             | 26.70%   | 387            | 47.40%   | 53           | 6.50%    | 35                    | 4.30%    |
| <b>COVID-19 is harmless</b>                                                             | 99                       | 12.10%   | 263             | 32.20%   | 367            | 44.90%   | 74           | 9.10%    | 14                    | 1.70%    |
| <b>Preference for acquired immunity via COVID-19 infection</b>                          | 45                       | 5.50%    | 135             | 16.50%   | 425            | 52.00%   | 152          | 18.60%   | 60                    | 7.30%    |
| <b>Vaccines contradict natural remedies</b>                                             | 55                       | 6.70%    | 200             | 24.50%   | 422            | 51.70%   | 104          | 12.70%   | 36                    | 4.40%    |
| <b>Moral opposition to get vaccinated</b>                                               | 127                      | 15.50%   | 252             | 30.80%   | 379            | 46.40%   | 38           | 4.70%    | 21                    | 2.60%    |
